# Supplementary material for: Issues in applying multi-arm multi-stage methodology to a clinical trial in prostate cancer: the MRC STAMPEDE trial
Source: Springer Nature journal article supplement (doi:10.1186/1745-6215-10-39), 2009-06-11
Supplement: 13063_2009_327_MOESM2_ESM.pdf [file 13063_2009_327_MOESM2_ESM.pdf]

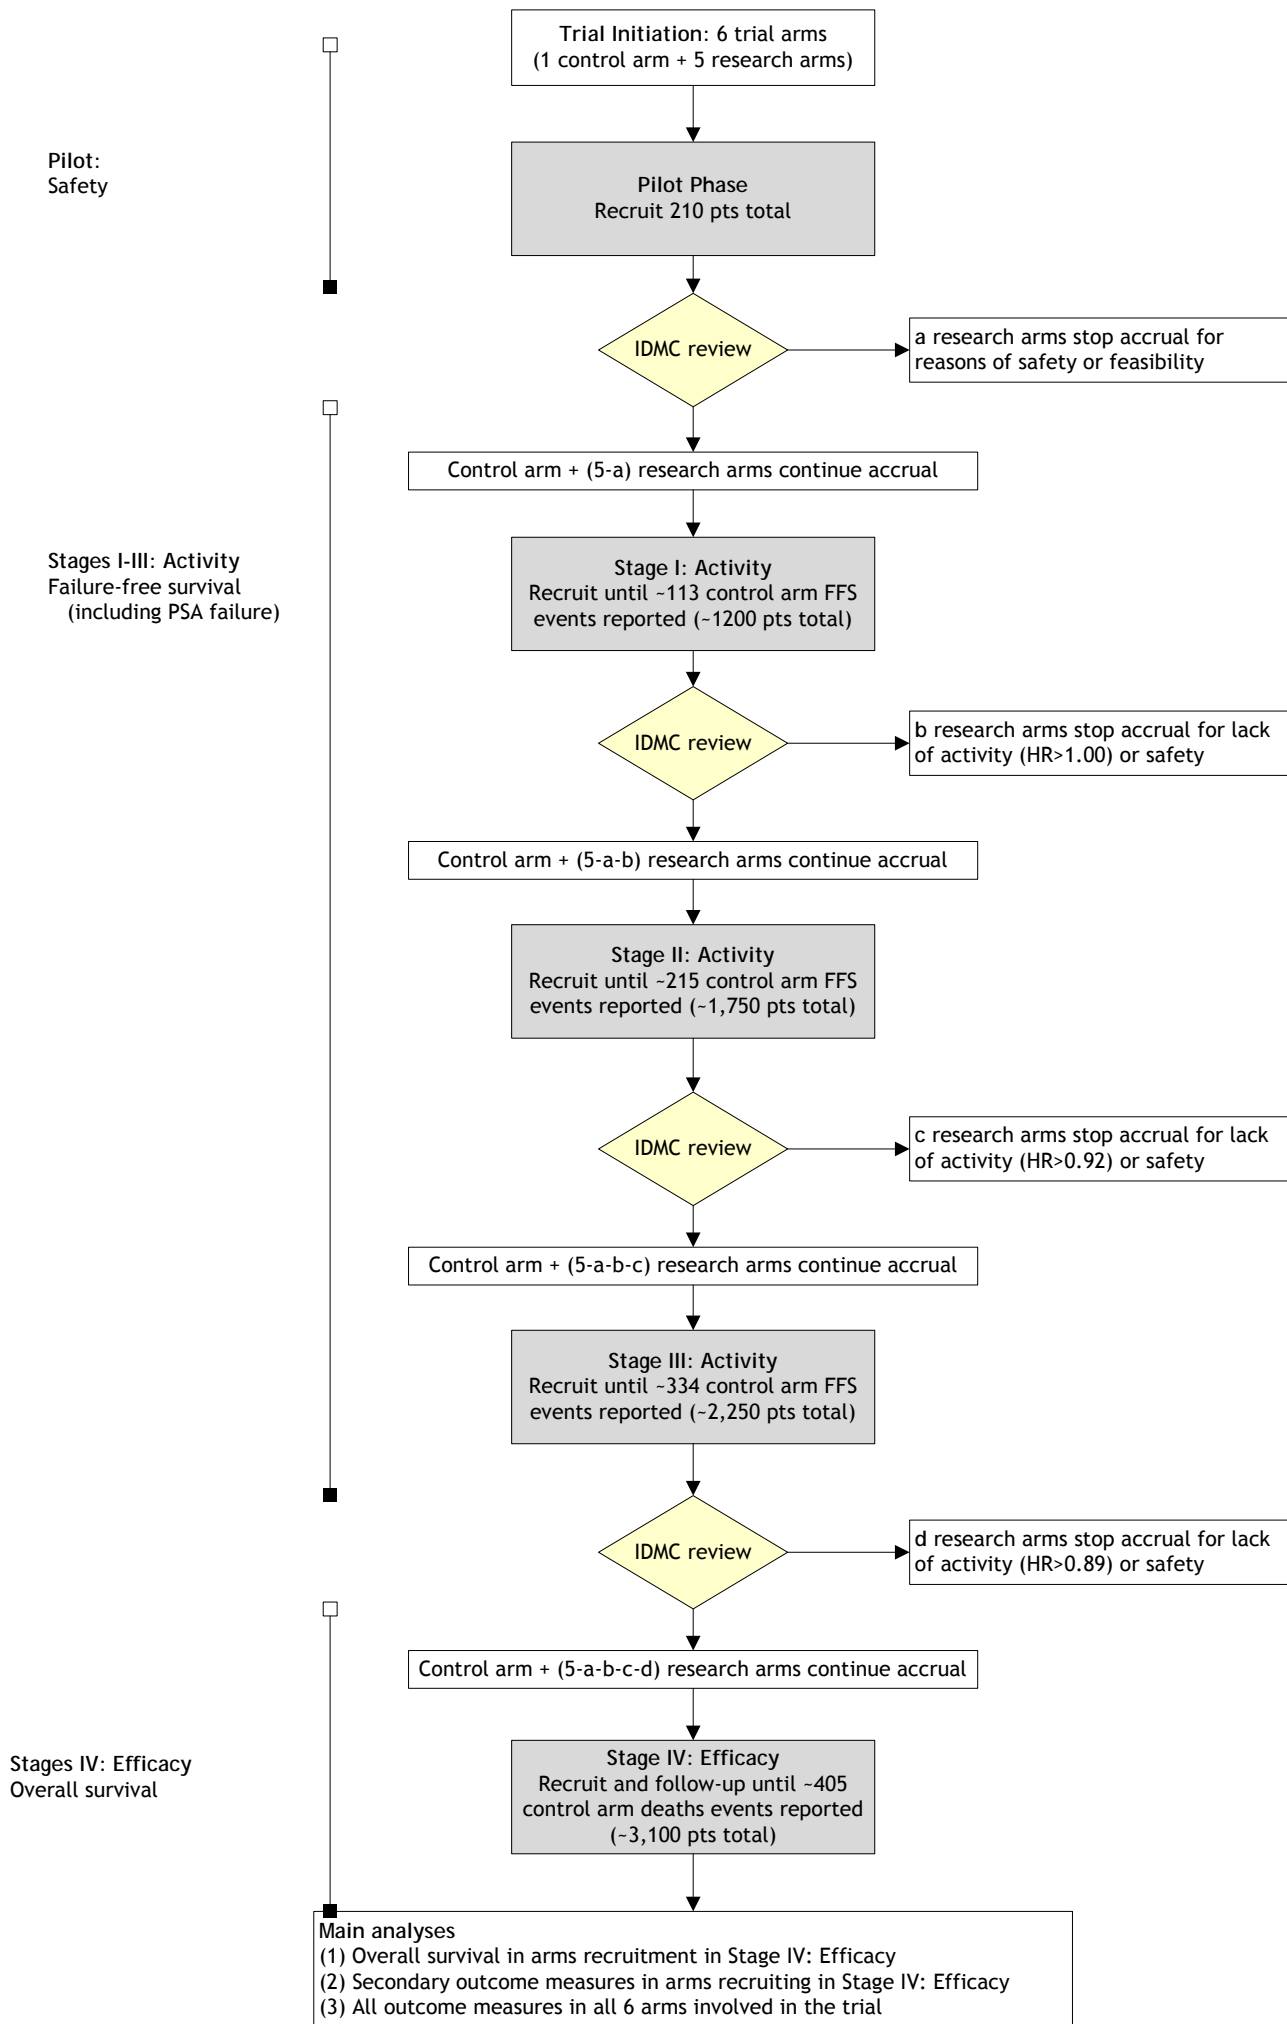

Key  
 FFS: Failure-free survival  
 HR: Hazard ratio  
 IDMC: Independent Data Monitoring Committee  
 Pts: Patients

Notes  
 Arms recruiting in a given stage:  $0 \leq d \leq c \leq b \leq a \leq 5$   
 Exact accrual depends on many factors including accrual rate, event rate and arms recruiting in each stage. Likely in range 2,600 to 3,600
