# Supplementary figures and images for: Issues in applying multi-arm multi-stage methodology to a clinical trial in prostate cancer: the MRC STAMPEDE trial
Source: Springer Nature journal article supplement (doi:10.1186/1745-6215-10-39), 2009-06-11

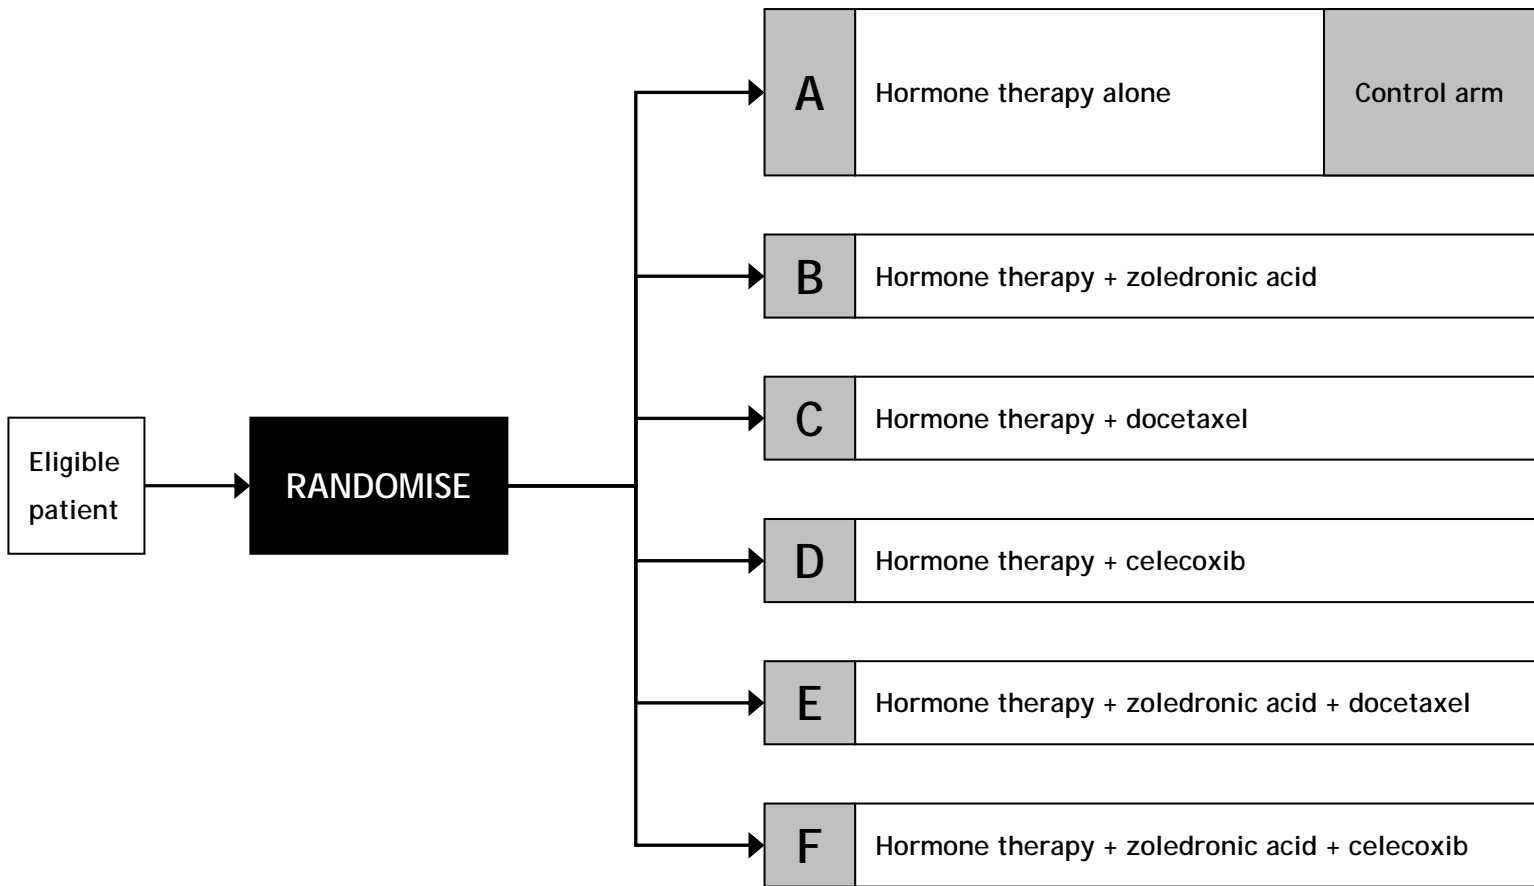

Supplement: 13063_2009_327_MOESM1_ESM.pdf [file 13063_2009_327_MOESM1_ESM.pdf]

# End of Activity Stage

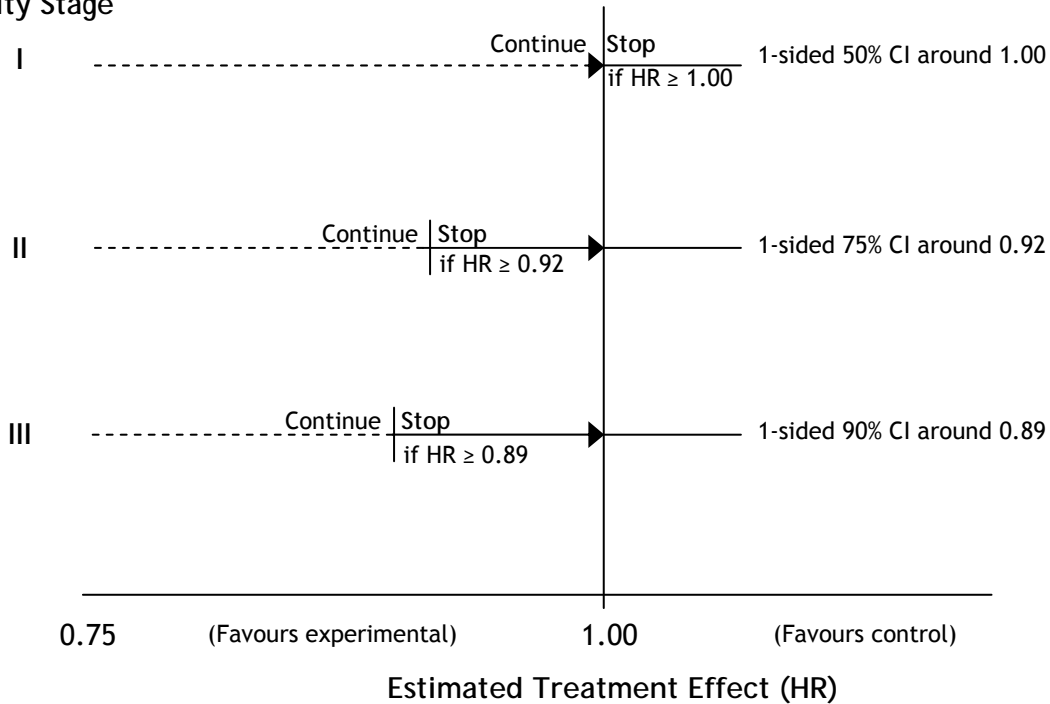

Supplement: 13063_2009_327_MOESM3_ESM.pdf [file 13063_2009_327_MOESM3_ESM.pdf]

# End of Stage II

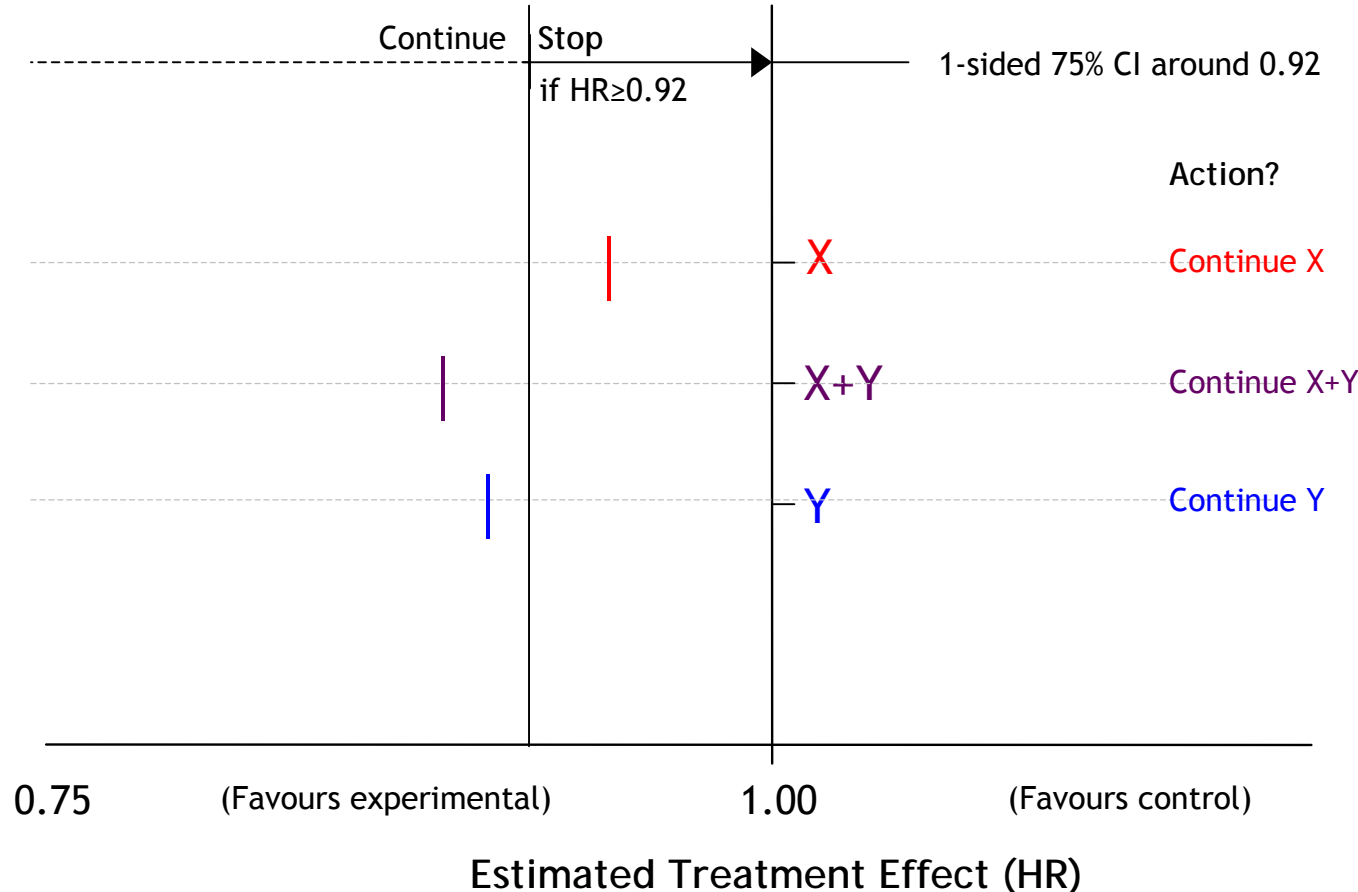

Supplement: 13063_2009_327_MOESM5_ESM.pdf [file 13063_2009_327_MOESM5_ESM.pdf]
